# Supplementary material
Source: HighWire-hosted journal article supplement (https://bmjopenrespres.bmj.com/content/6/1/e000377)
Supplement: inline-supplementary-material-1 [file inline-supplementary-material-1.pdf]

**Online supplementary data:**

**Smoking and lung function among adults with newly-onset asthma**

Short title: Smoking and lung function in adults with asthma

*Jouni J.K. Jaakkola<sup>1,2</sup>, MD, PhD, PhD; Samu Hernberg<sup>1,2</sup>, MD; Taina K. Lajunen<sup>1,2</sup>, PhD; Penpatra Sripaiboonkij<sup>1,2,3</sup>, PhD; L. Pekka Malmberg<sup>4</sup>, MD, PhD; Maritta S. Jaakkola<sup>1,2</sup>, MD, PhD*

<sup>1</sup>Center for Environmental and Respiratory Health Research, University of Oulu, Oulu, Finland

<sup>2</sup>Medical Research Center Oulu, Oulu, Finland, Oulu University Hospital, Oulu, Finland

<sup>3</sup>Physiotherapy and Sports Science, University College Dublin, Dublin, Ireland

<sup>4</sup>Skin and Allergy Hospital, Helsinki University Hospital and Helsinki University, Helsinki, Finland

**Online Supplementary Table 1.** Smoking and Post-bronchodilator FEV<sub>1</sub>, FVC, and FEV<sub>1</sub>/FVC in Working-age Adults with Newly Diagnosed Asthma, The Finnish Environment and Asthma Study 1997–2000

| Smoking                   | FEV <sub>1</sub> (L) |                         | FVC (L)              |                 | FEV <sub>1</sub> /FVC |                          |
|---------------------------|----------------------|-------------------------|----------------------|-----------------|-----------------------|--------------------------|
|                           | β                    | 95% CI                  | β                    | 95% CI          | β                     | 95% CI                   |
| <b>All</b> <sup>a</sup>   | n = 389 <sup>b</sup> |                         | n = 388 <sup>c</sup> |                 | n = 388 <sup>d</sup>  |                          |
| Never                     | reference            |                         | reference            |                 | reference             |                          |
| Quit >1 year ago          | 0.004                | -0.168 to 0.179         | 0.049                | -0.124 to 0.222 | -0.016                | -0.043 to 0.011          |
| Quit <1 year ago          | <b>-0.273</b>        | <b>-0.535 to -0.011</b> | -0.156               | -0.418 to 0.107 | <b>-0.041</b>         | <b>-0.082 to -0.0001</b> |
| Occasional                | -0.089               | -0.360 to 0.182         | -0.074               | -0.345 to 0.198 | -0.012                | -0.054 to 0.030          |
| Regular                   | <b>-0.160</b>        | <b>-0.314 to -0.006</b> | 0.053                | -0.102 to 0.207 | <b>-0.058</b>         | <b>-0.082 to -0.034</b>  |
| <b>Men</b> <sup>e</sup>   | n = 137 <sup>b</sup> |                         | n = 136 <sup>c</sup> |                 | n = 136 <sup>d</sup>  |                          |
| Never                     | reference            |                         | reference            |                 | reference             |                          |
| Quit >1 year ago          | 0.027                | -0.341 to 0.396         | -0.095               | -0.427 to 0.237 | 0.010                 | -0.044 to 0.064          |
| Quit <1 year ago          | -0.427               | -0.946 to 0.093         | -0.314               | -0.776 to 0.148 | -0.051                | -0.126 to 0.025          |
| Occasional                | -0.095               | -0.705 to 0.515         | -0.101               | -0.644 to 0.442 | -0.014                | -0.103 to 0.074          |
| Regular                   | -0.182               | -0.542 to 0.178         | 0.018                | -0.303 to 0.339 | <b>-0.061</b>         | <b>-0.113 to -0.009</b>  |
| <b>Women</b> <sup>e</sup> | n = 252 <sup>b</sup> |                         | n = 252 <sup>c</sup> |                 | n = 252 <sup>d</sup>  |                          |
| Never                     | reference            |                         | reference            |                 | reference             |                          |
| Quit >1 year ago          | -0.004               | -0.180 to 0.173         | 0.175                | -0.031 to 0.382 | <b>-0.036</b>         | <b>-0.067 to -0.005</b>  |
| Quit <1 year ago          | -0.187               | -0.461 to 0.087         | -0.095               | -0.415 to 0.225 | -0.029                | -0.076 to 0.019          |
| Occasional                | -0.059               | -0.323 to 0.205         | -0.027               | -0.336 to 0.282 | -0.014                | -0.060 to 0.032          |
| Regular                   | -0.120               | -0.269 to 0.029         | 0.057                | -0.117 to 0.231 | <b>-0.050</b>         | <b>-0.076 to -0.024</b>  |

<sup>a</sup> Adjusted for sex, age, height, education, past 12 months SHS, lifetime cumulative SHS, and mold odor

<sup>b</sup> Post-bronchodilator FEV<sub>1</sub> is available for 391 participants (138 men and 253 women), of whom smoking status missing for 2 (1 man and 1 woman)

<sup>c</sup> Post-bronchodilator FVC is available for 390 participants (137 men and 253 women) of whom smoking status missing for 2 (1 man and 1 woman)

<sup>d</sup> Post-bronchodilator FEV<sub>1</sub>/FVC is available for 390 participants (137 men and 253 women) of whom smoking status missing for 2 (1 man and 1 woman)

<sup>e</sup> Adjusted for age, height, education, past 12 months SHS, lifetime cumulative SHS, and mold odor

**Online Supplementary Table 2.** Daily Smoking Rates and Cumulative Cigarette-years in Regular Smokers and Post-bronchodilator Lung Function of Central Airways (FEV<sub>1</sub>, FVC, and FEV<sub>1</sub>/FVC) in Asthmatics, The Finnish Environment and Asthma Study 1997–2000

|                                | FEV <sub>1</sub> (L)  |                         | FVC (L)               |                 | FEV <sub>1</sub> /FVC |                         |
|--------------------------------|-----------------------|-------------------------|-----------------------|-----------------|-----------------------|-------------------------|
|                                | β                     | 95% CI                  | β                     | 95% CI          | β                     | 95% CI                  |
| <b>All<sup>a</sup></b>         |                       |                         |                       |                 |                       |                         |
| <i>Smoking rate</i>            | n=275 <sup>b, c</sup> |                         | n=275 <sup>b, c</sup> |                 | n=275 <sup>b, c</sup> |                         |
| Never smoker                   | reference             |                         | reference             |                 | reference             |                         |
| Regular smoker 1-14 cig/day    | -0.004                | -0.194 to 0.187         | 0.032                 | -0.163 to 0.228 | -0.015                | -0.044 to 0.014         |
| Regular smoker ≥15 cig/day     | <b>-0.359</b>         | <b>-0.561 to -0.157</b> | 0.013                 | -0.194 to 0.221 | <b>-0.102</b>         | <b>-0.133 to -0.072</b> |
| per 10 cig/day                 | <b>-0.159</b>         | <b>-0.253 to -0.066</b> | 0.004                 | -0.091 to 0.100 | <b>-0.045</b>         | <b>-0.060 to -0.031</b> |
| <i>Cumulative smoking</i>      | n=273 <sup>b, d</sup> |                         | n=273 <sup>b, d</sup> |                 | n=273 <sup>b, d</sup> |                         |
| Regular smoker 1-199 cig years | 0.051                 | -0.177 to 0.280         | 0.075                 | -0.157 to 0.307 | -0.012                | -0.047 to 0.024         |
| Regular smoker ≥200 cig years  | <b>-0.308</b>         | <b>-0.495 to -0.122</b> | 0.007                 | -0.197 to 0.183 | <b>-0.084</b>         | <b>-0.113 to -0.055</b> |
| per 100 cig years              | <b>-0.071</b>         | <b>-0.102 to -0.040</b> | -0.009                | -0.041 to 0.023 | <b>-0.017</b>         | <b>-0.022 to -0.013</b> |
| <b>Men<sup>e</sup></b>         |                       |                         |                       |                 |                       |                         |
| <i>Smoking rate</i>            | n=83 <sup>b</sup>     |                         | n=83 <sup>b</sup>     |                 | n=83 <sup>b</sup>     |                         |
| Never smoker                   | reference             |                         | reference             |                 | reference             |                         |
| Regular smoker 1-14 cig/day    | 0.160                 | -0.328 to 0.648         | 0.037                 | -0.392 to 0.465 | 0.016                 | -0.056 to 0.088         |
| Regular smoker ≥15 cig/day     | -0.374                | -0.804 to 0.057         | 0.043                 | -0.329 to 0.415 | <b>-0.107</b>         | <b>-0.170 to -0.043</b> |
| per 10 cig/day                 | -0.124                | -0.317 to 0.069         | 0.028                 | -0.138 to 0.193 | <b>-0.038</b>         | <b>-0.068 to -0.009</b> |
| <i>Cumulative smoking</i>      | n=83 <sup>b</sup>     |                         | n=83 <sup>b</sup>     |                 | n=83 <sup>b</sup>     |                         |
| Regular smoker 1-199 cig years | 0.195                 | -0.379 to 0.770         | 0.108                 | -0.391 to 0.607 | 0.0010                | -0.087 to 0.089         |
| Regular smoker ≥200 cig years  | -0.314                | -0.736 to 0.109         | -0.008                | -0.375 to 0.359 | <b>-0.083</b>         | <b>-0.147 to -0.018</b> |
| per 100 cig years              | -0.057                | -0.118 to 0.004         | 0.002                 | -0.051 to 0.055 | <b>-0.015</b>         | <b>-0.024 to -0.006</b> |
| <b>Women<sup>e</sup></b>       |                       |                         |                       |                 |                       |                         |
| <i>Smoking rate</i>            | n=192 <sup>b, c</sup> |                         | n=192 <sup>b, c</sup> |                 | n=192 <sup>b, c</sup> |                         |
| Never smoker                   | reference             |                         | reference             |                 | reference             |                         |
| Regular smoker 1-14 cig/day    | -0.083                | -0.273 to 0.107         | 0.022                 | -0.201 to 0.245 | -0.028                | -0.059 to 0.002         |
| Regular smoker ≥15 cig/day     | -0.211                | -0.449 to 0.027         | 0.082                 | -0.198 to 0.361 | <b>-0.086</b>         | <b>-0.124 to -0.048</b> |
| per 10 cig/day                 | <b>-0.128</b>         | <b>-0.241 to -0.016</b> | 0.021                 | -0.112 to 0.154 | <b>-0.046</b>         | <b>-0.064 to -0.028</b> |
| <i>Cumulative smoking</i>      | n=190 <sup>b, d</sup> |                         | n=190 <sup>b, d</sup> |                 | n=190 <sup>b, d</sup> |                         |

|                                |               |                         |       |                 |               |                         |
|--------------------------------|---------------|-------------------------|-------|-----------------|---------------|-------------------------|
| Regular smoker 1-199 cig years | -0.026        | -0.251 to 0.199         | 0.050 | -0.212 to 0.312 | -0.019        | -0.054 to 0.017         |
| Regular smoker ≥200 cig years  | <b>-0.211</b> | <b>-0.414 to -0.009</b> | 0.055 | -0.181 to 0.291 | <b>-0.078</b> | <b>-0.110 to -0.045</b> |
| per 100 cig years              | <b>-0.058</b> | <b>-0.100 to -0.016</b> | 0.002 | -0.047 to 0.052 | <b>-0.019</b> | <b>-0.026 to -0.013</b> |

<sup>a</sup> Adjusted for sex, age, height, education, past 12 months SHS, lifetime cumulative SHS, and mold odor

<sup>b</sup> FEV<sub>1</sub>, FVC, and FEV<sub>1</sub>/FVC are available for 276 regularly smoking or never smoking participants (83 men and 193 women)

<sup>c</sup> Smoking rate is missing for 1 women for daily smoking

<sup>d</sup> Cigarette years is missing for 3 women

<sup>e</sup> Adjusted for age, height, education, past 12 months SHS, lifetime cumulative SHS, and mold odor
